# Supplementary material for: RETRACTED ARTICLE: miR-3928v is induced by HBx via NF-κB/EGR1 and contributes to hepatocellular carcinoma malignancy by down-regulating VDAC3
Source: Springer Nature journal article supplement (doi:10.1186/s13046-018-0681-y), 2018-01-29
Supplement: MOESM2 [file 15422354]

**miR-3928v is induced by HBx via NF-κB/EGR1 and contributes to hepatocellular carcinoma malignancy by down-regulating VDAC3**

Qiaoge Zhang1*, Ge Song1*, Lili Yao1, Yankun Liu1, 2, Min Liu1, Shengping Li3, Hua Tang1*

**Table S1** **Sequences of the primers used in this study**

| Name | Sequence (5'-3') |
| --- | --- |
| pri-miR-3928v-S-XhoI | CGGGATCCCGTCAATCTGTTGGGTAAG |
| pri-miR-3928v-AS-EcoRI | GGAATTCGGCCTCCCAAACTGCTG |
| ASO-miR-3928v | UGCCGAAGCUCCAAGGUUCCUCC |
| ASO-NC | CAGUACUUUUGUGUAGUACAA |
| miR-3928v-RT | GTCGTATCCAGTGCAGGGTCCGAGGTGCACTGGATACGACTGCCGAAG |
| miR-3928v-Fwd | TGCGGGGAGGAACCTTGGAGC |
| miR-16-RT | GTCGTATCCAGTGCAGGGTCCGAGGTGCACTGGATACGACCGCCAAT |
| miR-16-Fwd | GCCCGCTAGCAGCACGTAAATAT |
| U6-RT | GTCGTATCCAGTGCAGGGTCCGAGGTGCACTGGATACGACAAAATATGG |
| U6-Fwd | TGCGGGTGCTCGCTTCGGCAGC |
| Reverse | CCAGTGCAGGGTCCGAGGT |
| VDAC3-S-EcoRI | TTCGAATTCATGTGTAACACACCAACGTAC |
| VDAC3-AS-XhoI | CAAACTCGAGGCAGCTTCCAGTTCAAATCC |
| VDAC3/miR-3928v-3’UTR-Luc-top | CTAGAAGTGTTATTAAATGTGTTCCTCACTCGAGGCCGG |
| VDAC3/miR-3928v-3’UTR-Luc-Bot | CCTCGAGTGAGGAACACATTTAATAACACTT |
| VDAC3/miR-3928v-3’UTR(mut)-Luc-top | CTAGAAGTGTTATTAAATGTCATGGTGACTCGA GGCCGG |
| VDAC3/miR-3928v-3’UTR(mut)-Luc-bot | CCTCGAGTCACCATGACATTTAATAACACTT |
| VDAC3-qPCR-S | CTCTTGGGAGAATAAGTTGG |
| VDAC3-qPCR-AS | AGTTTGGATTTGGCTGTGTC |
| β-actin-qPCR–Fwd | CGTGACATTAAGGAGAAGCTG |
| β-actin-qPCR-Rev | CTAGAAGCATTTGCGGTGGAC |
| shR-VADC3-Top | GATCCACGTACUGTGACCTAGGAAAGCTCGAGCTTTC  CTAGGTCACAGTACGTTTTTTGA |
| shR-VADC3-Bot | AGCTTCAAAAAACGTACUGTGACCTAGGAAAGCTCGA  GCTTTCCTAGGTCACAGTACGTG |
| miR-3928v-pro-1307-KpnI-s | GTAAGGGTACCTGCATTGGCCTTATTTAC |
| miR-3928v-pro-1307-XhoI-as | TATACTCGAGCCTCTTCCGGTTGGGGCC |
| miR-3928v-pro-335-XhoI-as | TATACTCGAGGCTTCCACTTCATCTTTA |
| miR-3928v-pro-972-KpnI-s | GTAAGGGTACCCCTCTTTGCCGTAACAGT |
| miR-3928v-pro-637-KpnI-s | GTAAGGGTACCGAAAACTGAGGCCCAGCA |
| miR-3928v-pro-302-KpnI-s | CAGGGTACCCCGGTCTTGCTGTCTCTG |
| EGR1-S-KpnI | GGGGTACCGCCACCATGGCCGCGGCCAAGGCCGA |
| EGR1-AS-EcoRI | CCGGAATTCGCGCAAATTTCAATTGTCCTGGGAG |
| EGR1-qPCR-S | TCGAGTTGGCAAAATGGGGT |
| EGR1-qPCR-AS | GCCACATGTGAGAGTACGGT |
| shR-EGR1-Top | GATCCGACATCTCTCTGAACAACGAGAAGCTCGAGCTTCTCGTTGTTCAGAGAGATGTCTTTTTGA |
| shR-EGR1-Bot | AGCTTCAAAAAGACATCTCTCTGAACAACGAGAAGCTCGAGCTTCTCGTTGTTCAGAGAGATGTCG |
| Chip-EGR1/miR-3928v-pro-Fwd | CCGTCCCTAAACTTTGGCG |
| Chip-EGR1/miR-3928v-pro-Rev | TGACTGGGCTGGCGTTAAC |
| B-miR-3928V-pro | CTAAACTTTGGCGCCCCCGCCCCAACCCCAGC-Biotin |
