# Supplementary material for: RETRACTED ARTICLE: miR-3928v is induced by HBx via NF-κB/EGR1 and contributes to hepatocellular carcinoma malignancy by down-regulating VDAC3
Source: Springer Nature journal article supplement (doi:10.1186/s13046-018-0681-y), 2018-01-29
Supplement: MOESM3 [file 15422354]

**miR-3928v is induced by HBx via NF-κB/EGR1 and contributes to hepatocellular carcinoma malignancy by down-regulating VDAC3**

Qiaoge Zhang1*, Ge Song1*, Lili Yao1, Yankun Liu1, 2, Min Liu1, Shengping Li3, Hua Tang1*

**Table S2 Novel miRNAs identified by** **Solexa sequencing**

| **Name** | **Count** | **Mfe (****kcal/mol)** | **Mature sequence (5'-3')** | **Precursor sequence (5'-3')** |
| --- | --- | --- | --- | --- |
| TLRC-m0002_3p | 17 | -27.10 | TGGGAGGAACAAGTATGCATT | AGAGGGTTGCAGTGGCTGCCTTGCTCCTCGTCACTCTGATTGTCTTGCAGTGGGAGGAACAAGTATGCATTTGCTTCTCTT |
| TLRC-m0008_3p | 16 | -45.30 | GGAGGAACCTTGGAGCTTCGGCA | CCGGAAGAGGTTAATTTCCATGGCTGAAGCTCTAAGGTTCCGCCTGCGGGCAGGAAGCGGAGGAACCTTGGAGCTTCGGCAGCTTTTCAAA |
| TLRC-m0010_3p | 7 | -33.30 | GCTGGCTCGCGATGTCTGTTT | GCCAGTGGCGCAATGGATAACGCGTCTGACTACGGATCAGAAGATTCTAGGTTCGACTCCTGGCTGGCTCGCGATGTCTGTTTTGCCACACTT |
| TLRC-m0011_5p | 11 | -34.80 | CACTGGCATTAGTGGGACTTTT | ATAGGGCAATCACTGGCATTAGTGGGACTTTTTTTTTTTTTTTTTTTAATGTTAAAAGTCCCACTAATGCCAGCTCAGTGATTAA |
| TLRC-m0012_3p | 20 | -18.00 | TCTGTTTGTCGTAGGCAGATGG | ACTATGAGGGCTATGTGGCTAATTGAAGAGCATGCAATGAGTGATTCTAAGTCTGTTTGTCGTAGGCAGATGGAGCTTGTTAT |
| TLRC-m0013_3p | 406 | -22.20 | TCGGGCGGGAGTGGTGGCTTTT | AGTCGGTAGAGCATCAGACTTTTAATCTGAGGGTCCAGGGTTCAAGTCCCTGTTCGGGCGGGAGTGGTGGCTTTTAGTACCTGAT |
| TLRC-m0031_3p | 6 | -37.60 | TCTGTGGGAGGTGAGACGACG | TGGGAGGTGAGATGGCGCCTCCTCTCCTTCCTGACACTTTCACTCTGTCGGTGTCTGTGGGAGGTGAGACGACGCCTCCTCTCC |
